# Supplementary material
Source: publisher site journal article supplement (https://www.dovepress.com/article/228702)
Supplement: Supplementary file 1 [file get_supplementary_file.php]

**
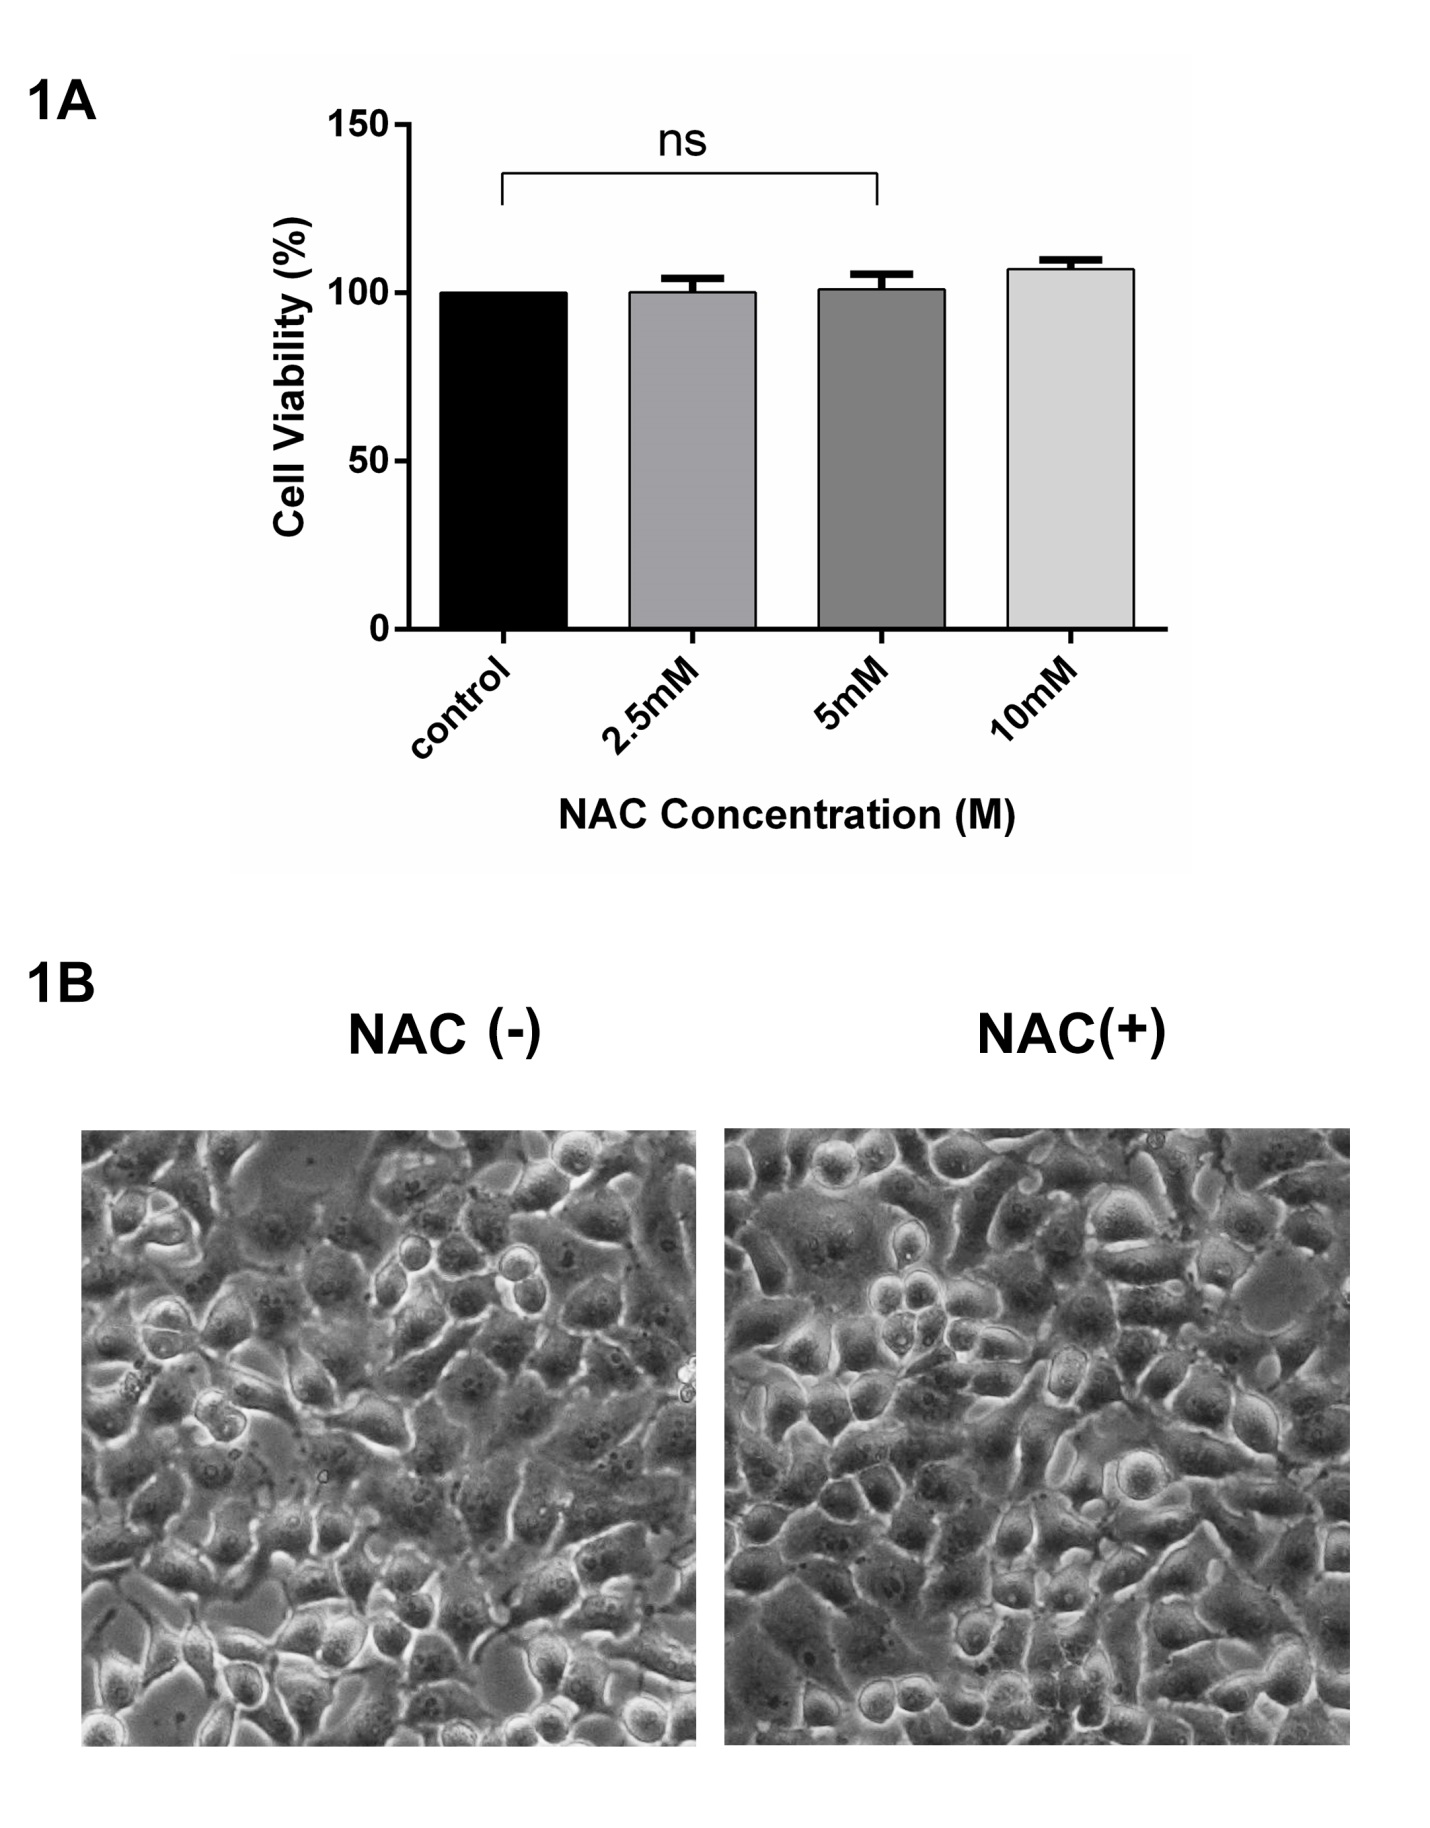
**

**Figure S1 (A)** MCF-7 cells were supplemented with indicated concentrations of NAC for 24 h and CCK-8 assay kit was used to measure cell viability percentage. **(B)** Morphology of MCF-7 cells was observed in presence or absence of NAC (5mM). **(A)** Graphical data are expressed as Mean ± SD while all experiments were performed in triplicate independently.
